# Supplementary material
Source: publisher figshare collection journal article supplement (https://karger.figshare.com/ndownloader/files/22739204)
Supplement: Supplementary file 1 [file 22739204]

**Supplementary tables**

| **Table S1. Descriptive statistical analysis for selected urinary metabolites investigated by NMR for -TM patients** | | | | | |
| --- | --- | --- | --- | --- | --- |
| **Metabolite** | **median** | **min** | **max** | **Kurtosis** | **Skewness** |
| val | 2.9 | 0.7 | 8.2 | 3.59 | 1.33 |
| -hbu | 7.9 | 0.8 | 21.8 | 0.96 | 0.72 |
| un | 109.9 | 9.9 | 1110.8 | 12.00 | 2.95 |
| thr | 33.9 | 9.2 | 135.7 | 2.04 | 1.52 |
| lac | 15.9 | 3.9 | 93.8 | 5.39 | 2.23 |
| ala | 61.2 | 5.9 | 179.9 | 0.57 | 0.99 |
| Ac | 20.4 | 1.6 | 120.6 | 5.56 | 2.35 |
| citr | 578.9 | 72.0 | 2523.4 | 3.91 | 1.75 |
| tau | 69.1 | 19.6 | 134.8 | 1.39 | 0.76 |
| carn | 5.6 | 1.5 | 43.4 | 9.45 | 2.89 |
| btai | 20.2 | 2.5 | 116.4 | 1.95 | 1.54 |
| tmao | 55.2 | 10.8 | 943.2 | 12.53 | 3.52 |
| gly | 221.0 | 56.6 | 904.5 | 0.28 | 0.99 |
| hipp | 55.2 | 2.1 | 270.8 | 3.63 | 1.85 |
| form | 140.6 | 46.9 | 684.0 | 5.86 | 2.39 |
| Values are reported as mmol of metabolite/mol of creatinine ratio.  Ala, alanine; Gly, glycine; Val, valine; Thr, threonine; Hypp, hyppuric acid; Lac, lactic acid; btai, N,N,N-trimethylglycine; Carn, carnitine; Form, formic acid; tmao, Trimethylamine n-oxide; Citr, citric acid; Ac, acetic acid; Tau, taurine; -hbu, -hydroxubutirric acid; un, unknow. | | | | | |

| **Table S2. Descriptive statistical analysis for selected urinary metabolites investigated by NMR for control subjects** | | | | | |
| --- | --- | --- | --- | --- | --- |
| **Metabolite** | **median** | **min** | **max** | **Kurtosis** | **Skewness** |
| val | 1.6 | 0.5 | 3.2 | -0.034 | 0.58 |
| -hbu | 8.4 | 2.9 | 150.5 | 8.74 | 2.51 |
| un | 12.3 | 0.0 | 71.1 | 4.02 | 1.85 |
| thr | 14.0 | 4.0 | 61.1 | 5.08 | 1.97 |
| lac | 16.4 | 2.9 | 58.1 | 1.28 | 1.46 |
| ala | 32.8 | 2.4 | 64.9 | -0.48 | -0.012 |
| Ac | 9.4 | 3.7 | 31.5 | 4.01 | 1.67 |
| citr | 442.3 | 193.7 | 1044.7 | -0.31 | 0.76 |
| tau | 48.6 | 33.7 | 245.3 | 24.46 | 4.76 |
| carn | 2.6 | 0.0 | 25.3 | 10.49 | 2.99 |
| btai | 6.9 | 0.7 | 36.9 | 8.74 | 2.51 |
| tmao | 52.0 | 9.9 | 355.1 | 8.73 | 2.72 |
| gly | 72.5 | 22.0 | 244.9 | 2.34 | 1.75 |
| hipp | 110.5 | 12.3 | 301.1 | -0.20 | 0.57 |
| form | 38.8 | 1.8 | 134.0 | -0.24 | 0.65 |
| Values are reported as mmol of metabolite/mol of creatinine ratio.  Ala, alanine; Gly, glycine; Val, valine; Thr, threonine; Hypp, hyppuric acid; Lac, lactic acid; btai, N,N,N-trimethylglycine; Carn, carnitine; Form, formic acid; tmao, Trimethylamine n-oxide; Citr, citric acid; Ac, acetic acid; Tau, taurine; -hbu, -hydroxubutirric acid; un, unknow. | | | | | |
